# Supplementary material
Source: publisher figshare collection journal article supplement (https://frontiersin.figshare.com/ndownloader/files/11277353)
Supplement: Supplementary file 1 [file 11277353]

---

# ***Supplementary Material:***

## **The Effect of Size Fraction in Analyses of Benthic Foraminiferal Assemblages: A Case Study Comparing Assemblages from the >125 and >150 $\mu\text{m}$ Size Fractions**

### **1 METRIC MULTIDIMENSIONAL SCALING QUALITY ASSESSMENT**

**Table S1.** Summary of the eigenvalues for a metric multidimensional scaling of benthic foraminiferal assemblages from the Pefka E section. Values are given for the ordination solutions of the >125  $\mu\text{m}$  and >150  $\mu\text{m}$  fractions separately, and for the combined ordination of both size fractions.

|                          | >125 $\mu\text{m}$ fraction | >150 $\mu\text{m}$ fraction | Combined data |
|--------------------------|-----------------------------|-----------------------------|---------------|
| Minimum                  | −0.245                      | −0.225                      | −0.481        |
| 1 <sup>st</sup> quartile | −0.030                      | −0.027                      | −0.038        |
| Median                   | −0.004                      | −0.004                      | −0.014        |
| Mean                     | 0.088                       | 0.082                       | 0.089         |
| 3 <sup>rd</sup> quartile | 0.056                       | 0.044                       | 0.036         |
| Maximum                  | 3.487                       | 2.779                       | 6.654         |

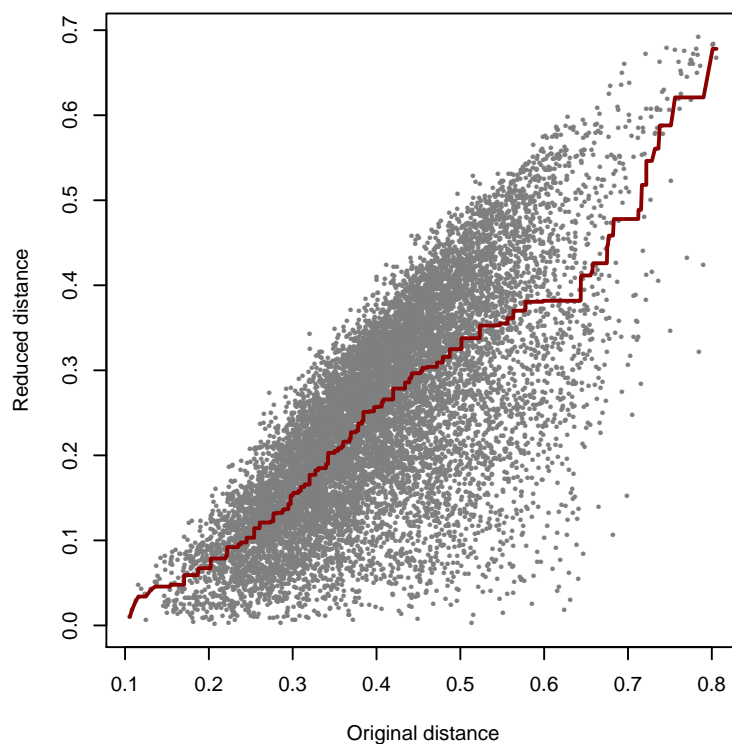

Figure S1: Shepard plot for the metric multidimensional scaling of the  $>125\ \mu\text{m}$  size fraction of benthic foraminiferal assemblages from the Pefka E section.

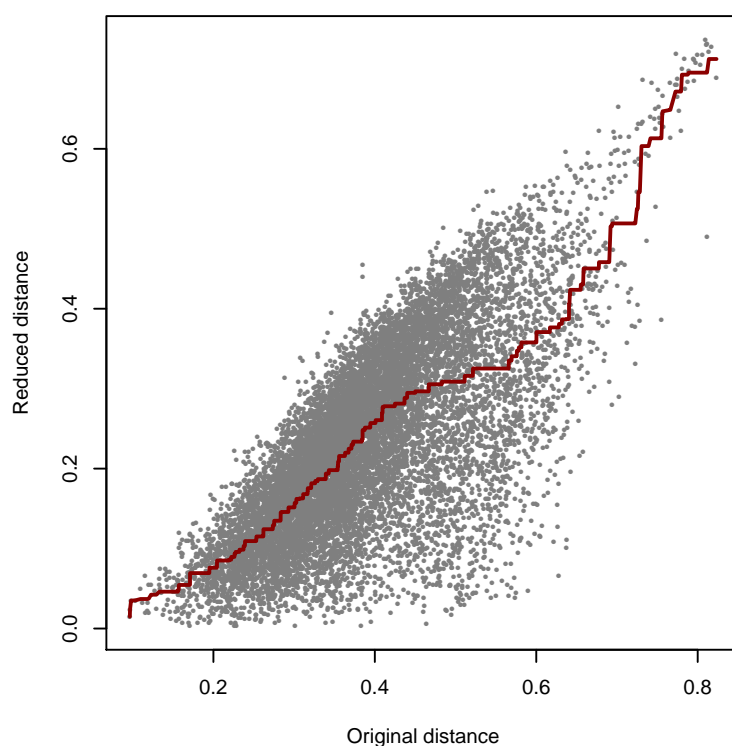

Figure S2: Shepard plot for the metric multidimensional scaling of the  $>150\ \mu\text{m}$  size fraction of benthic foraminiferal assemblages from the Pefka E section.

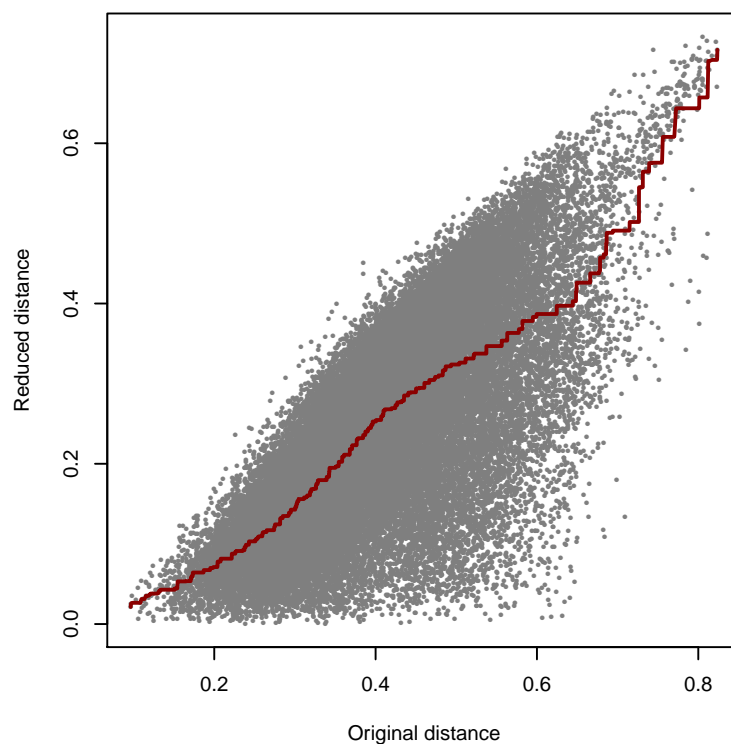

Figure S3: Shepard plot for the metric multidimensional scaling of the combined  $>125\ \mu\text{m}$  and  $>150\ \mu\text{m}$  size fractions of benthic foraminiferal assemblages from the Pefka E section.

## 2 SAMPLE RAREFACTIONING

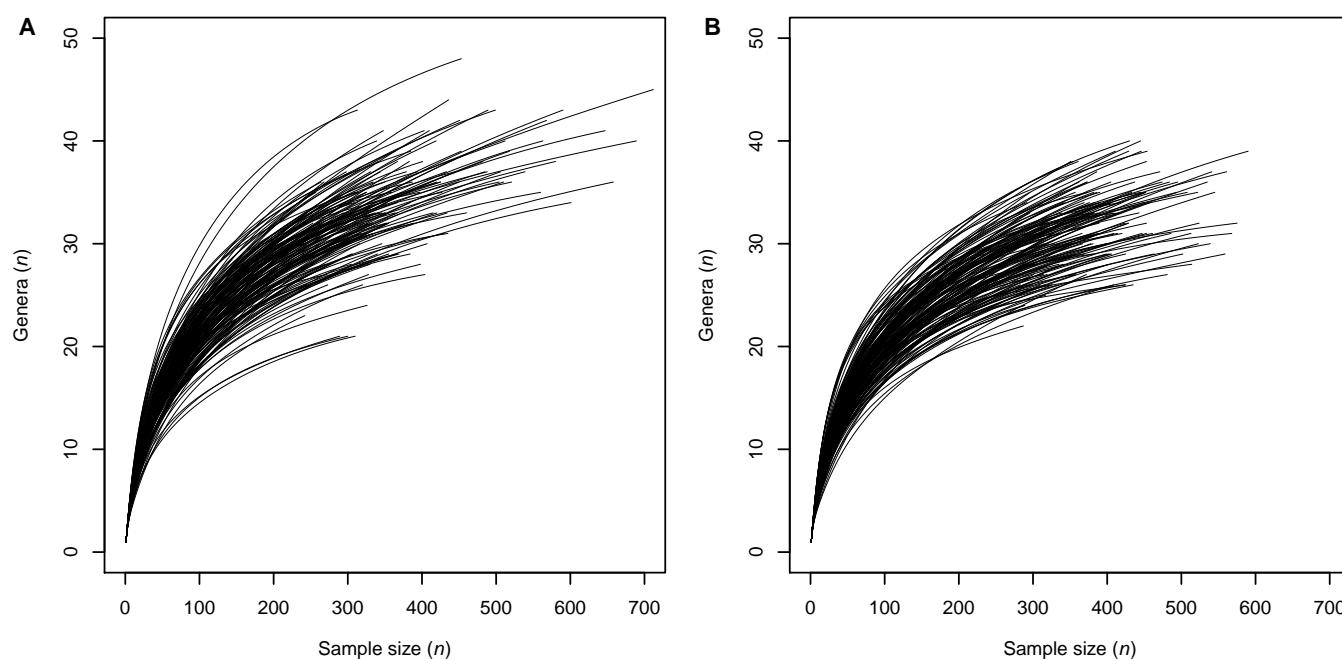

Figure S4: Rarefaction curves of the  $>125\ \mu\text{m}$  (A) and  $>150\ \mu\text{m}$  (B) size fractions of benthic foraminiferal assemblages from the Pefka E section. The consistent shape of curves between both samples implies that observed differences in biodiversity do not result from undersampling of either size fraction.

### 3 ABUNDANCE CURVES

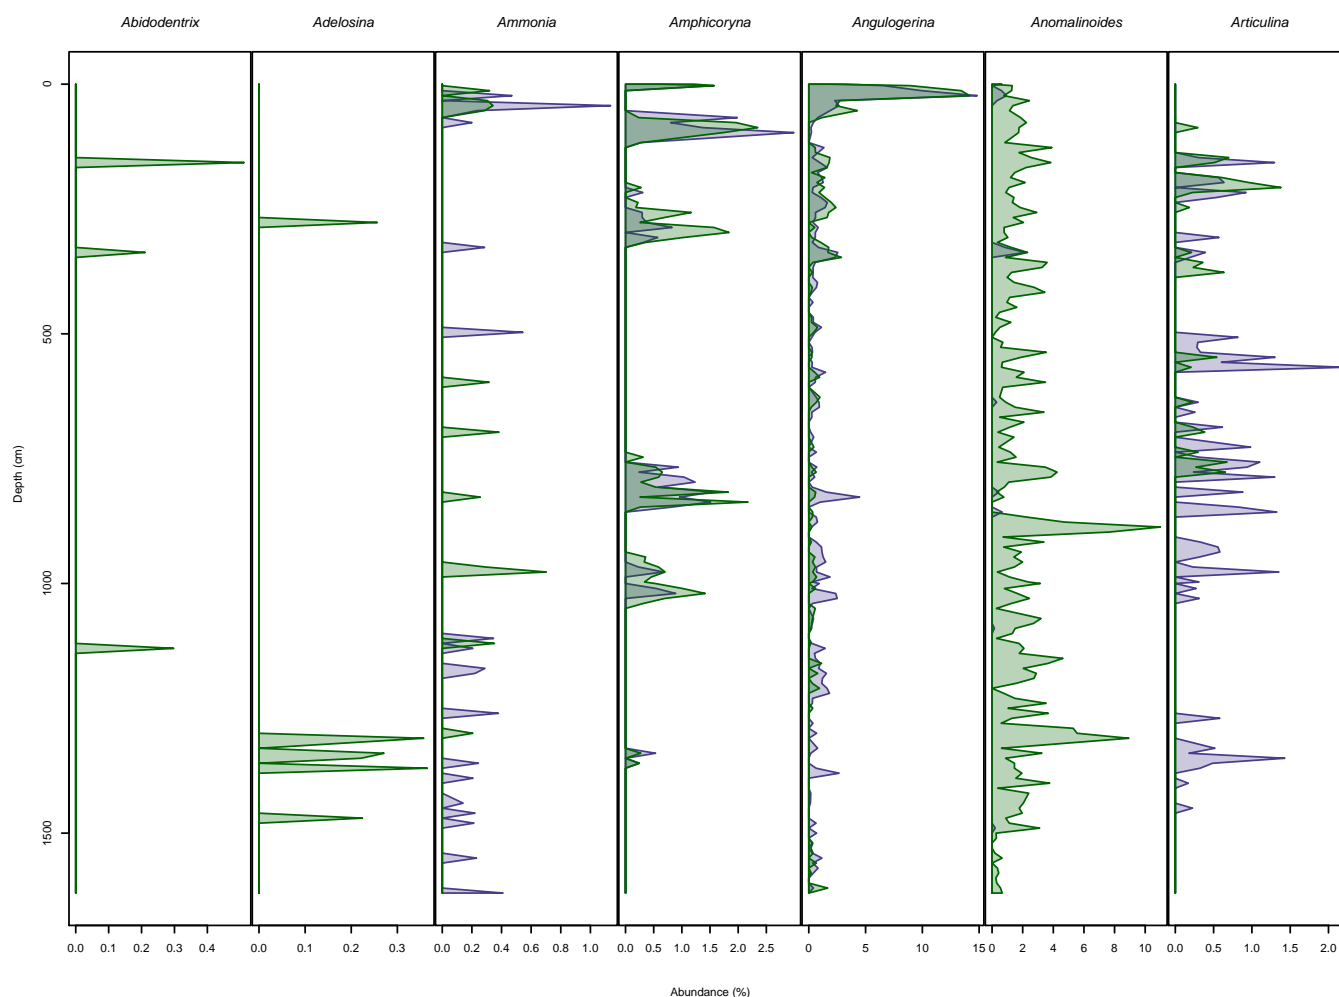

Figure S5: Relative abundances of genera of benthic Foraminifera from the Pefka E section. The abundances within the  $>125\ \mu\text{m}$  fraction (purple) and the  $>150\ \mu\text{m}$  fraction (green) are plotted together in the same graph.

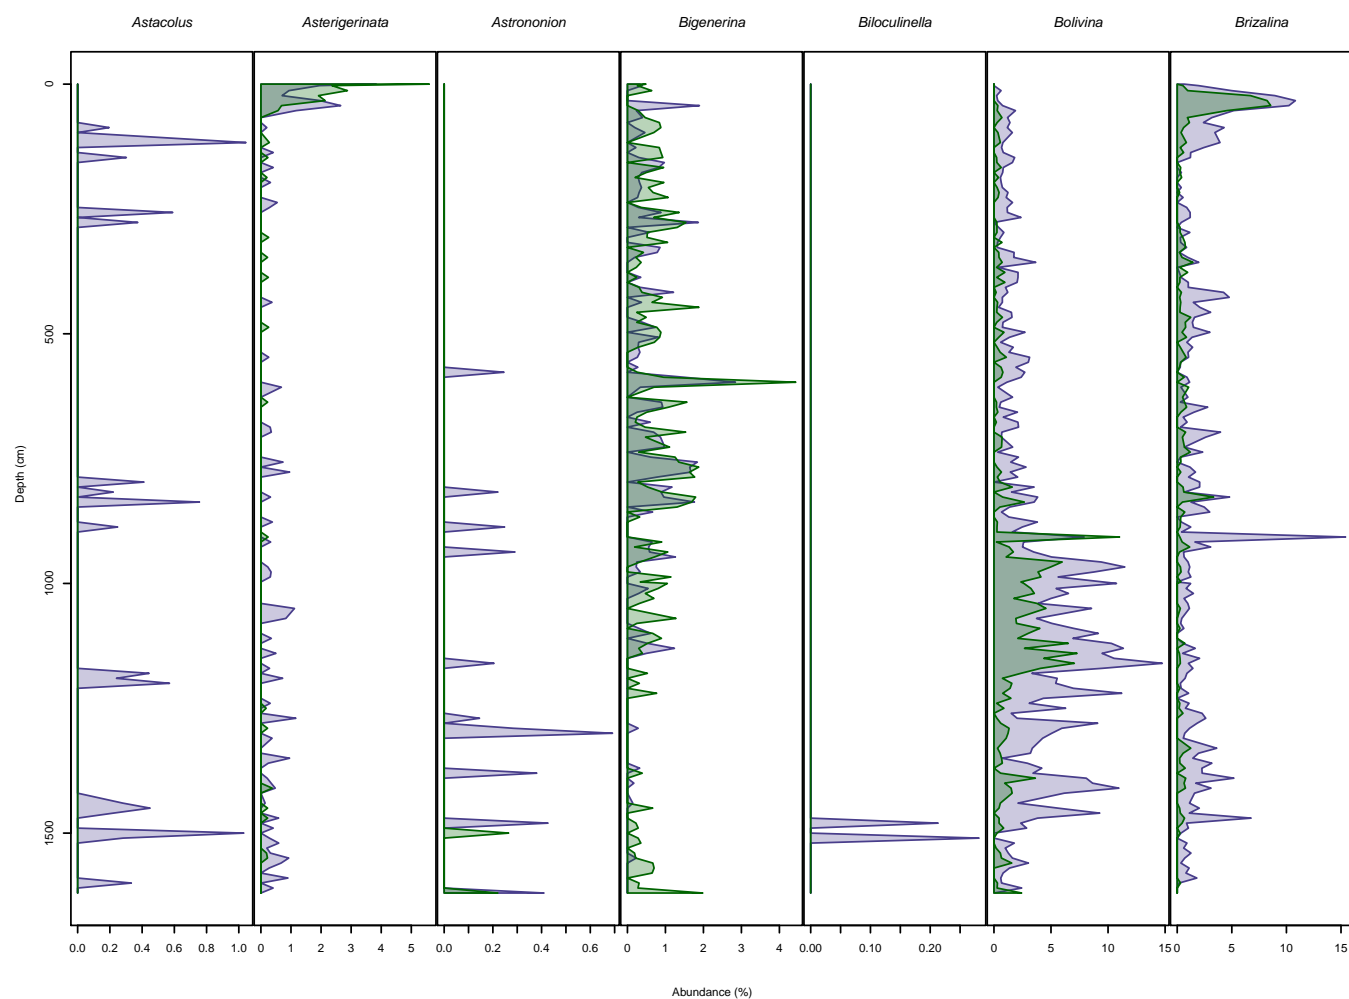

Figure S6: Relative abundances of genera of benthic Foraminifera from the Pefka E section. The abundances within the  $>125\ \mu\text{m}$  fraction (purple) and the  $>150\ \mu\text{m}$  fraction (green) are plotted together in the same graph.

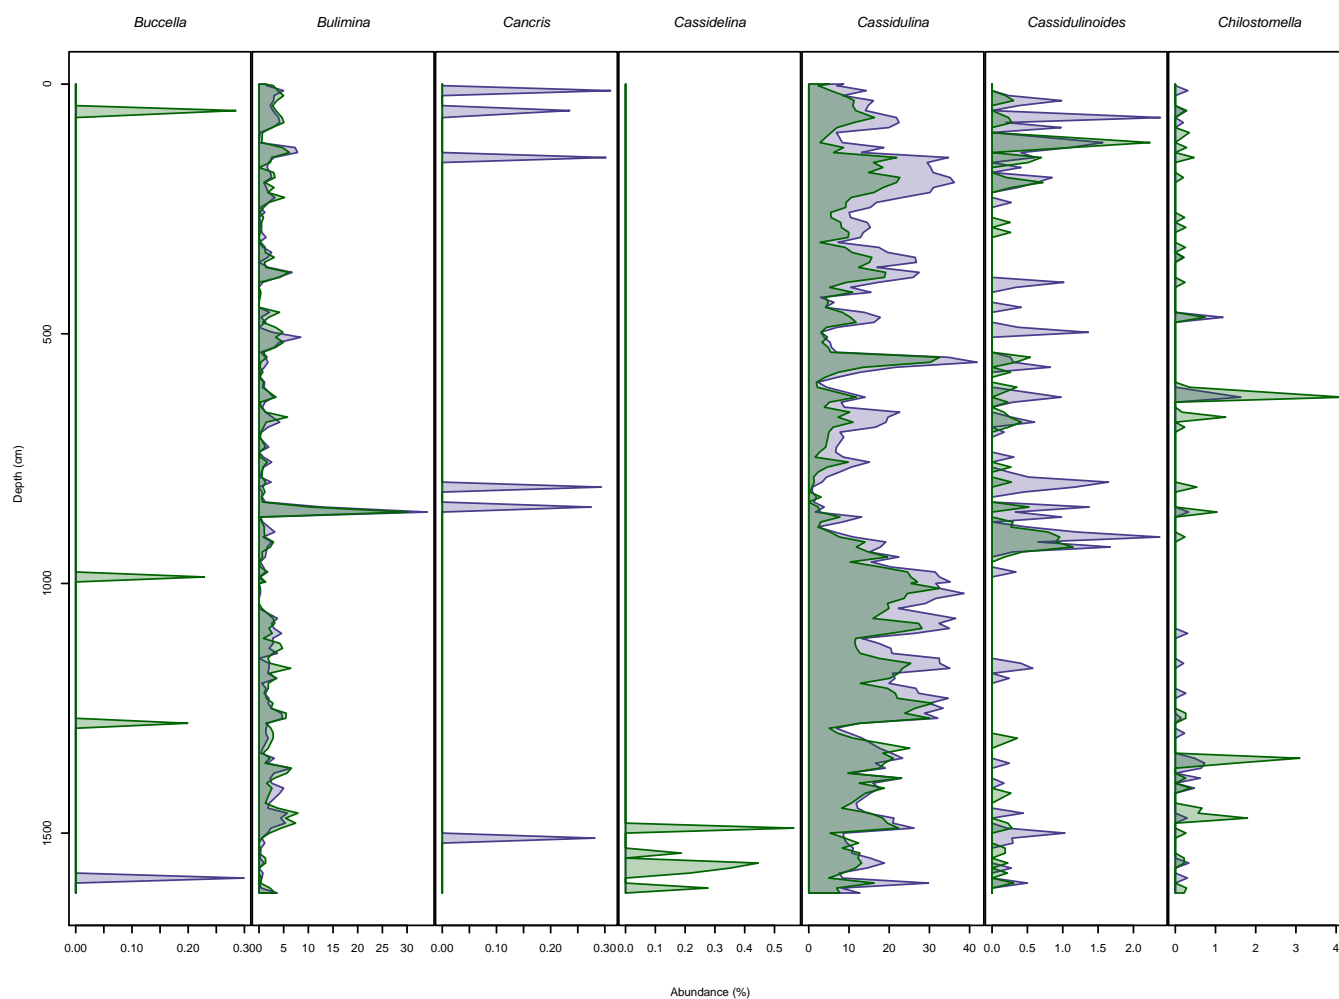

Figure S7: Relative abundances of genera of benthic Foraminifera from the Pefka E section. The abundances within the  $>125\ \mu\text{m}$  fraction (purple) and the  $>150\ \mu\text{m}$  fraction (green) are plotted together in the same graph.

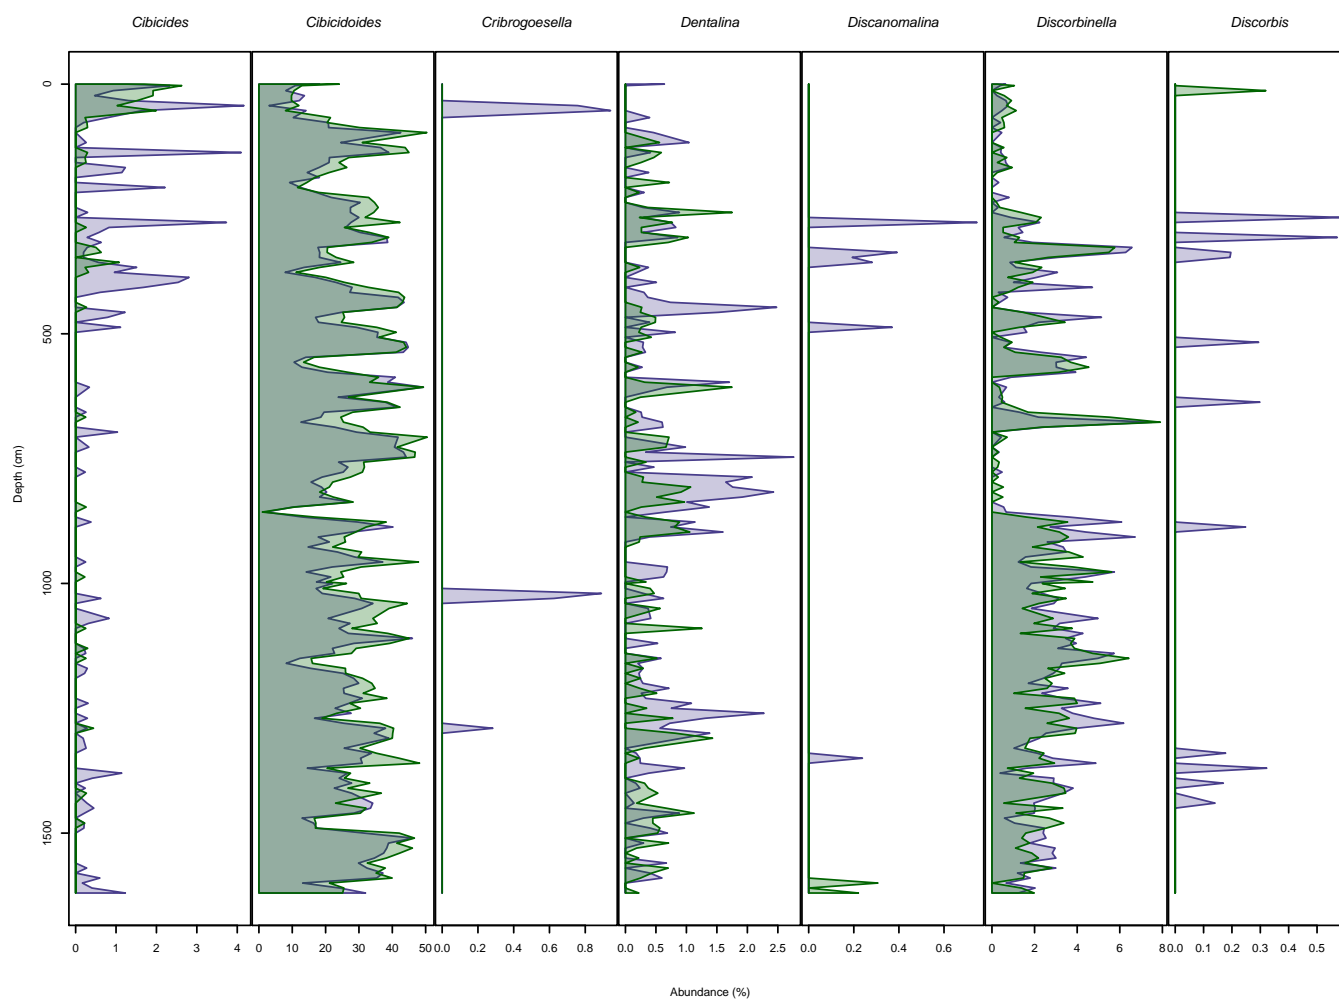

Figure S8: Relative abundances of genera of benthic Foraminifera from the Pefka E section. The abundances within the  $>125\ \mu\text{m}$  fraction (purple) and the  $>150\ \mu\text{m}$  fraction (green) are plotted together in the same graph.

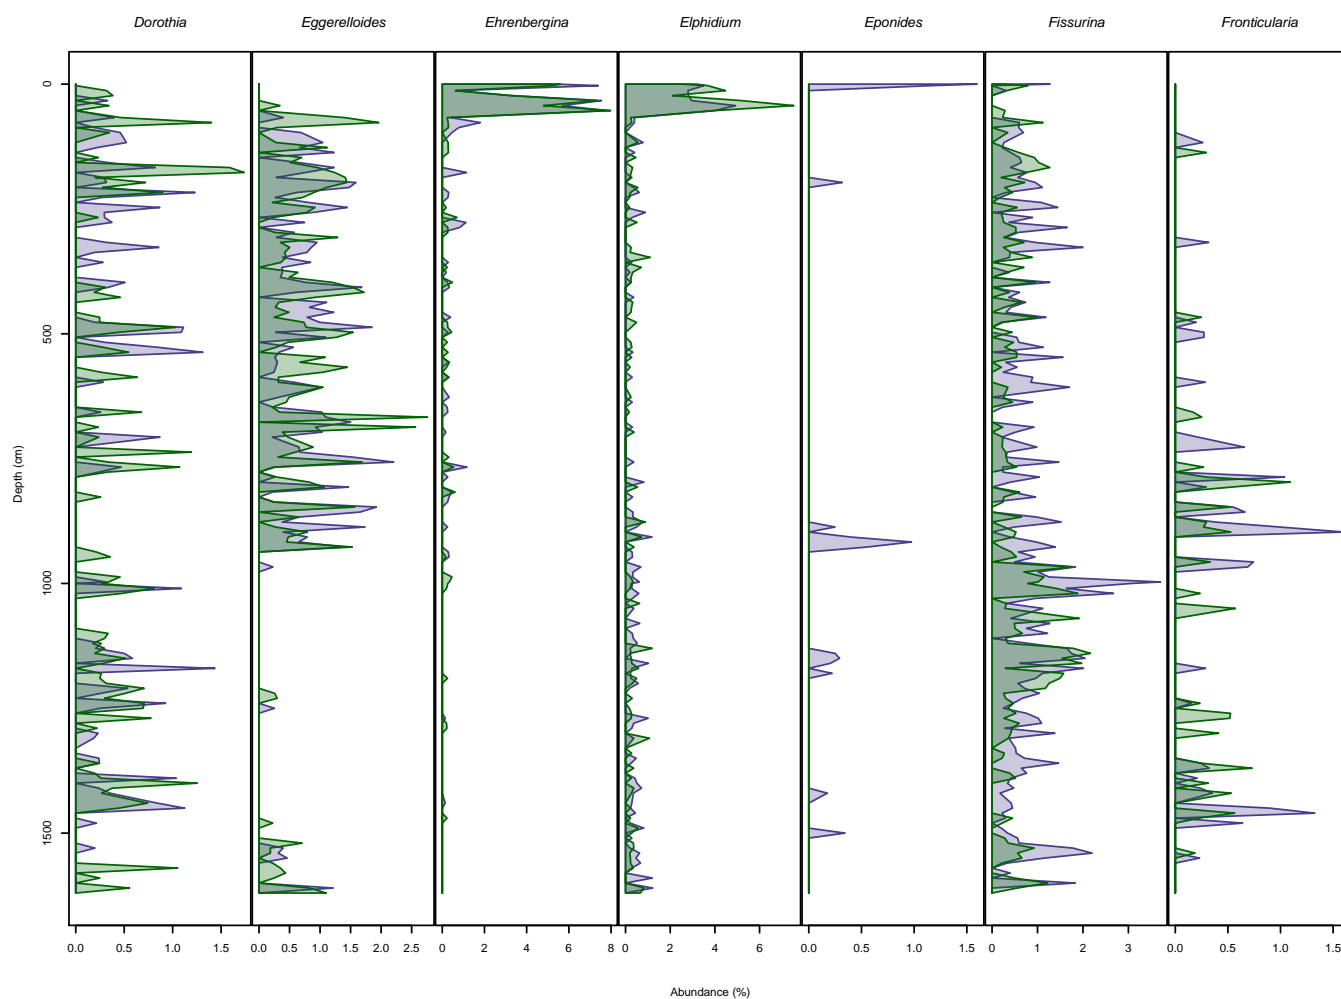

Figure S9: Relative abundances of genera of benthic Foraminifera from the Pefka E section. The abundances within the >125 µm fraction (purple) and the >150 µm fraction (green) are plotted together in the same graph.

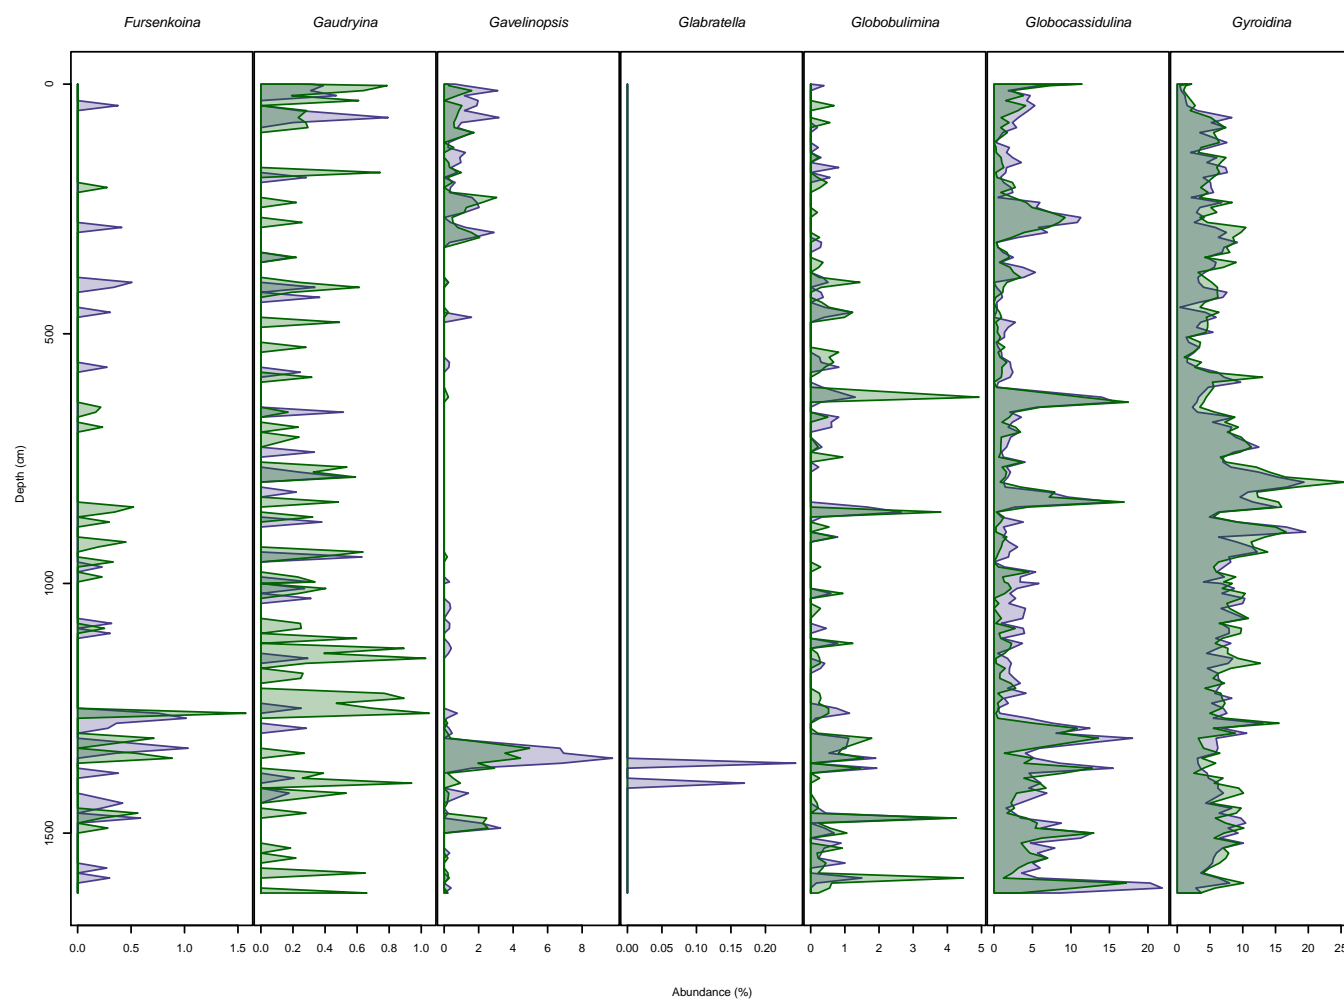

Figure S10: Relative abundances of genera of benthic Foraminifera from the Pefka E section. The abundances within the >125 µm fraction (purple) and the >150 µm fraction (green) are plotted together in the same graph.

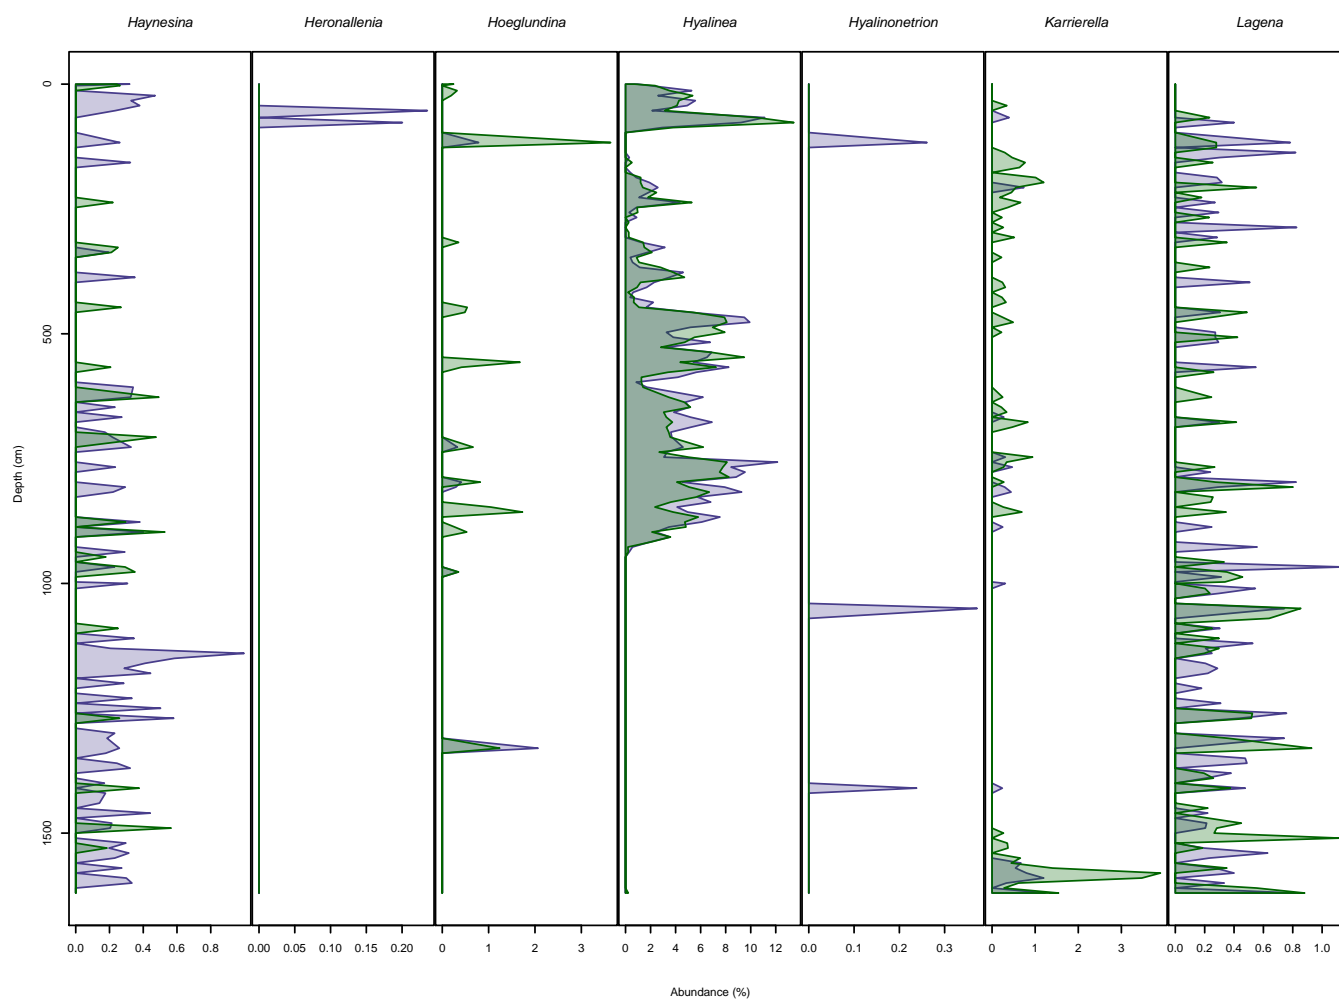

Figure S11: Relative abundances of genera of benthic Foraminifera from the Pefka E section. The abundances within the >125 µm fraction (purple) and the >150 µm fraction (green) are plotted together in the same graph.

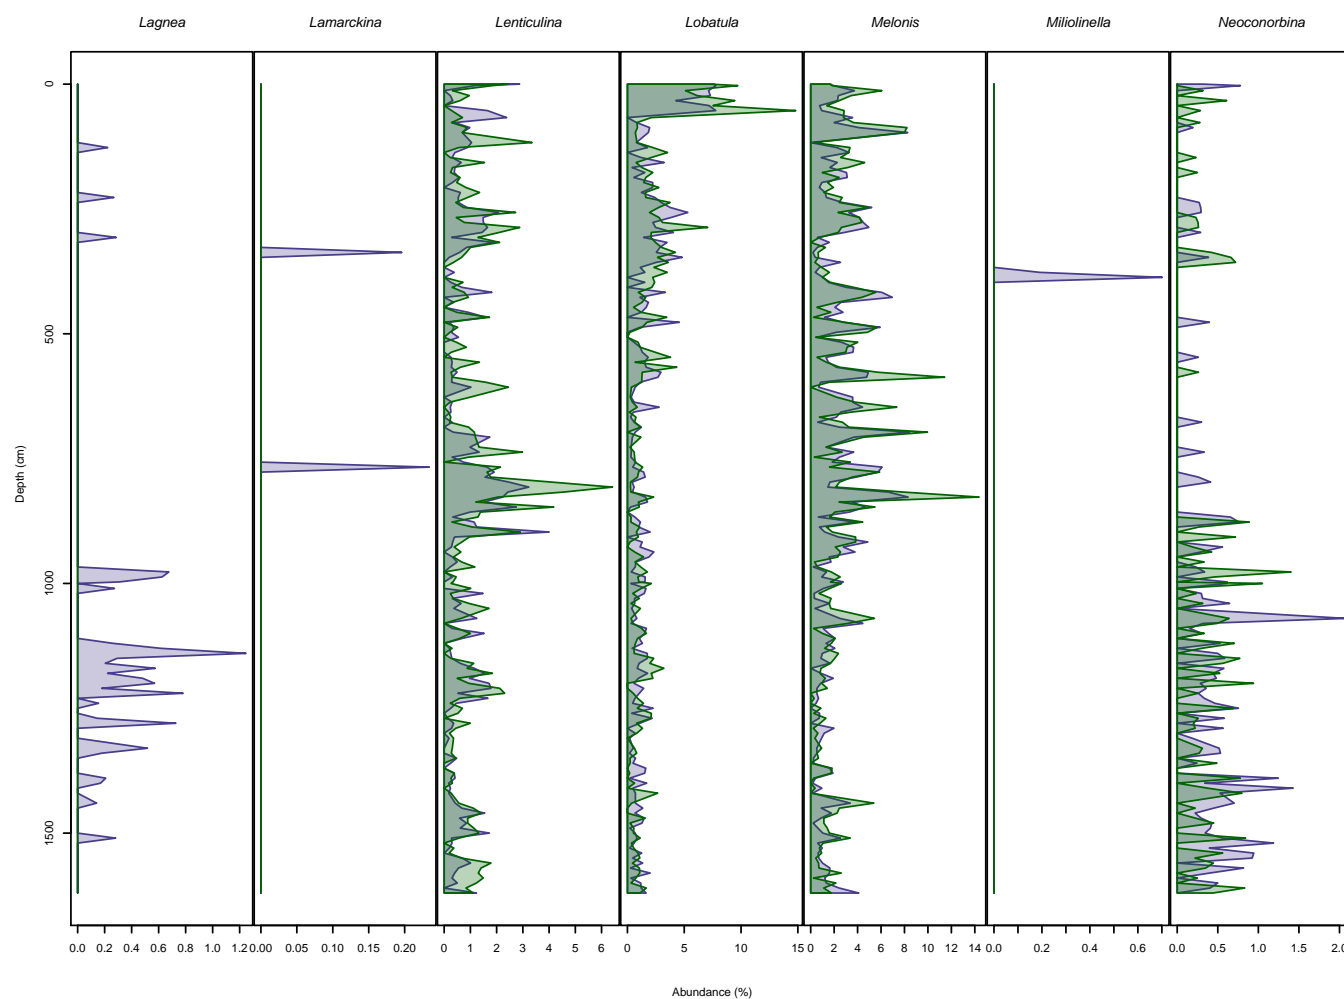

Figure S12: Relative abundances of genera of benthic Foraminifera from the Pefka E section. The abundances within the >125 µm fraction (purple) and the >150 µm fraction (green) are plotted together in the same graph.

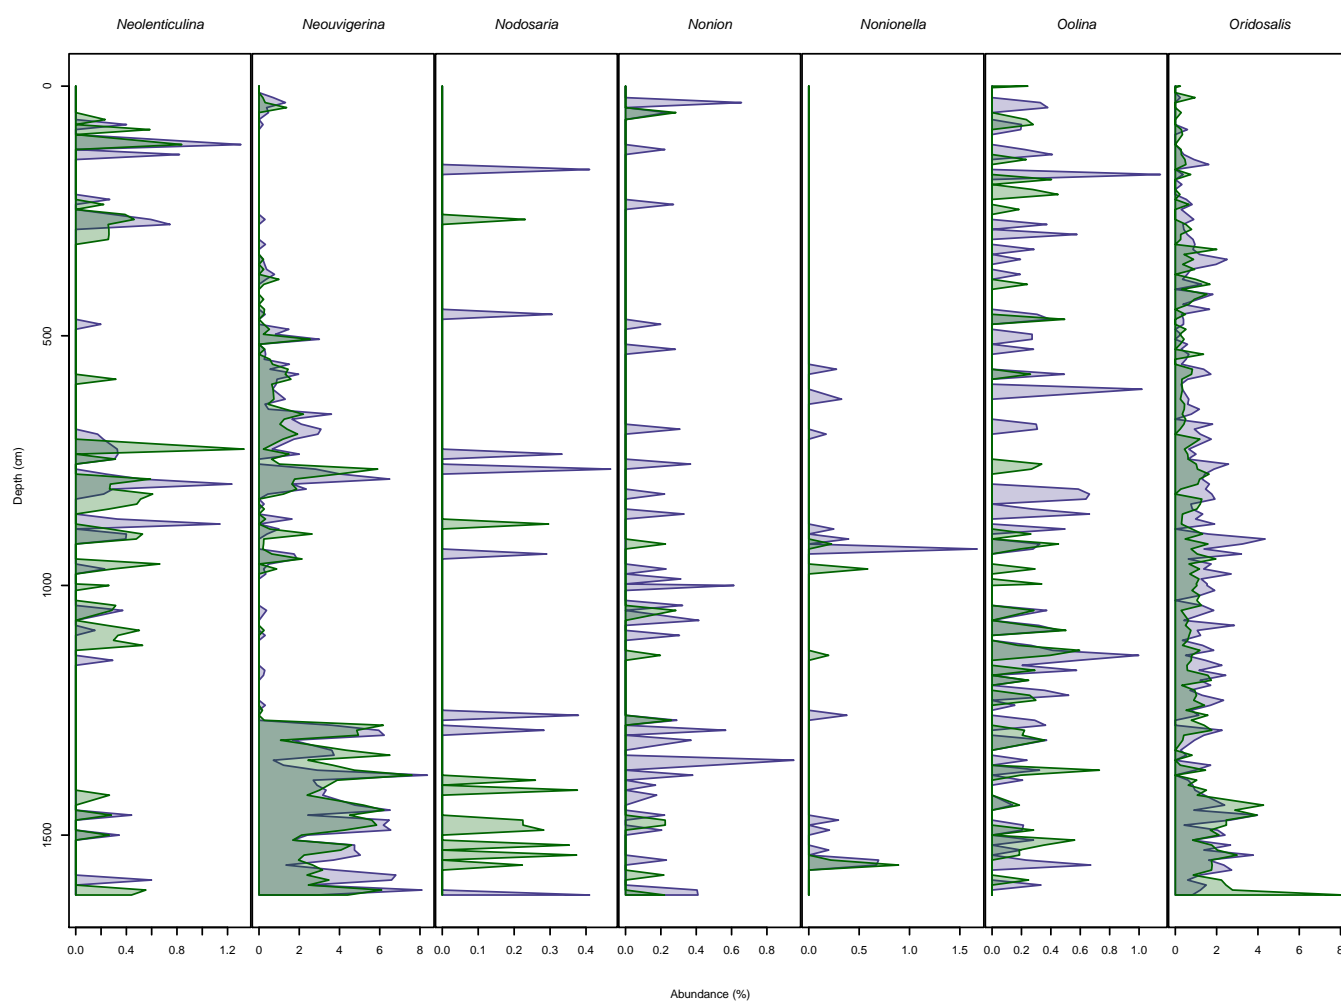

Figure S13: Relative abundances of genera of benthic Foraminifera from the Pefka E section. The abundances within the >125 µm fraction (purple) and the >150 µm fraction (green) are plotted together in the same graph.

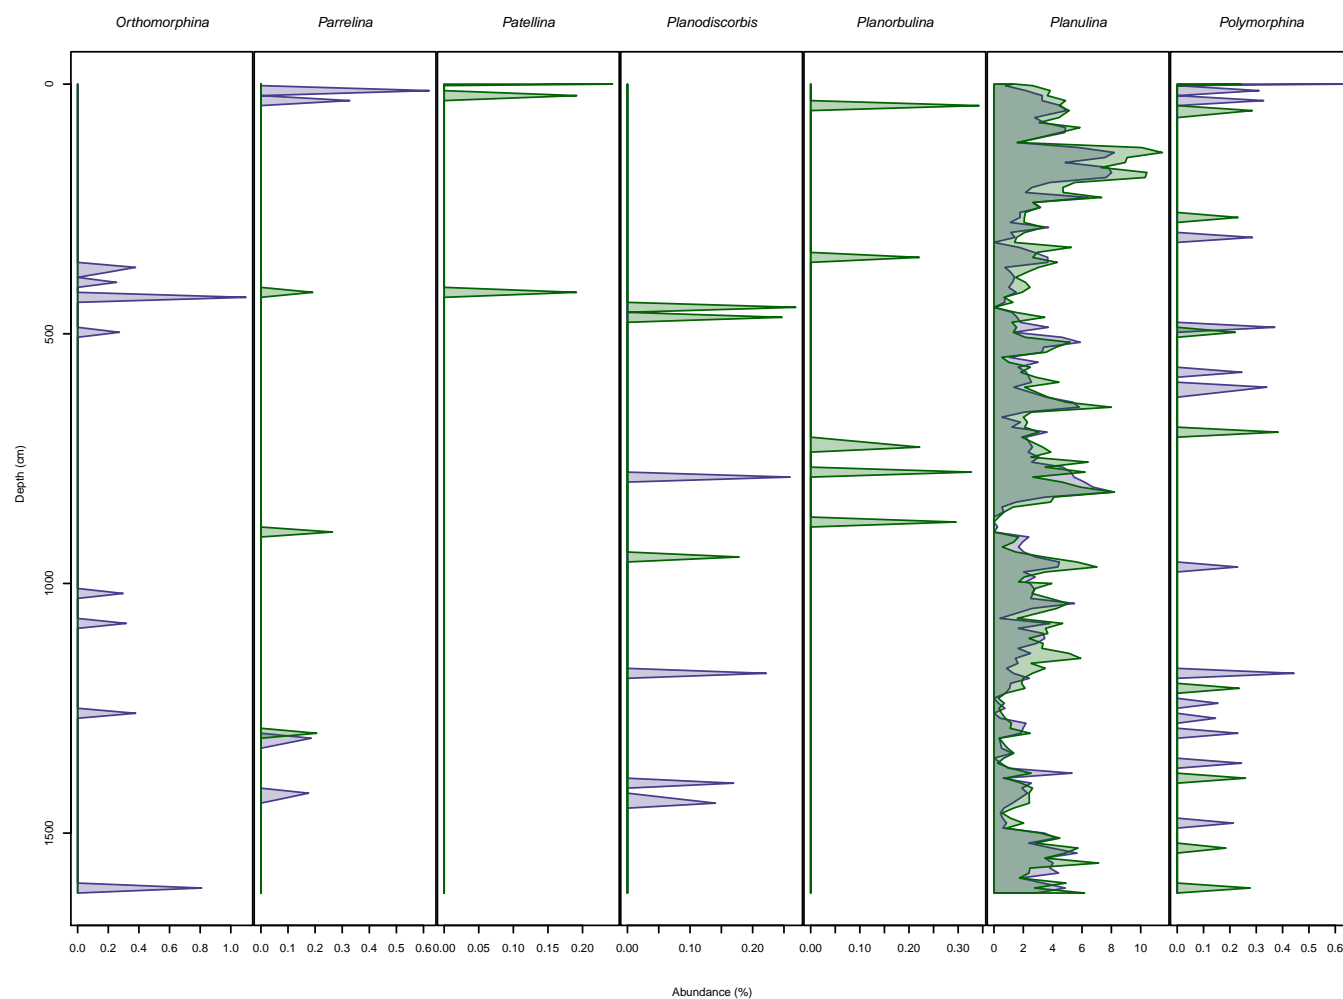

Figure S14: Relative abundances of genera of benthic Foraminifera from the Pefka E section. The abundances within the  $>125\ \mu\text{m}$  fraction (purple) and the  $>150\ \mu\text{m}$  fraction (green) are plotted together in the same graph.

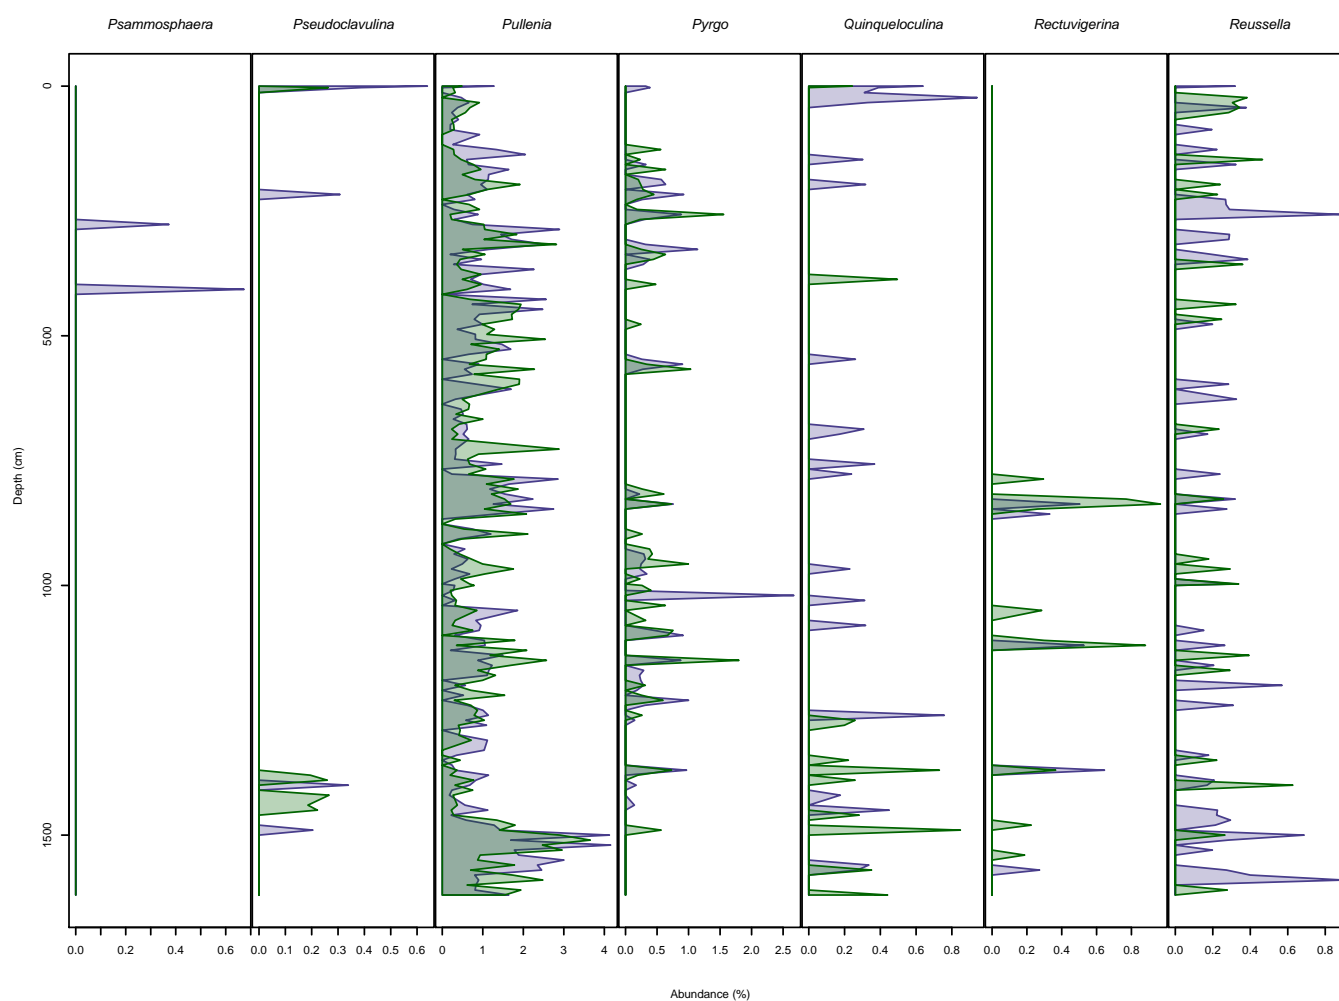

Figure S15: Relative abundances of genera of benthic Foraminifera from the Pefka E section. The abundances within the >125 µm fraction (purple) and the >150 µm fraction (green) are plotted together in the same graph.

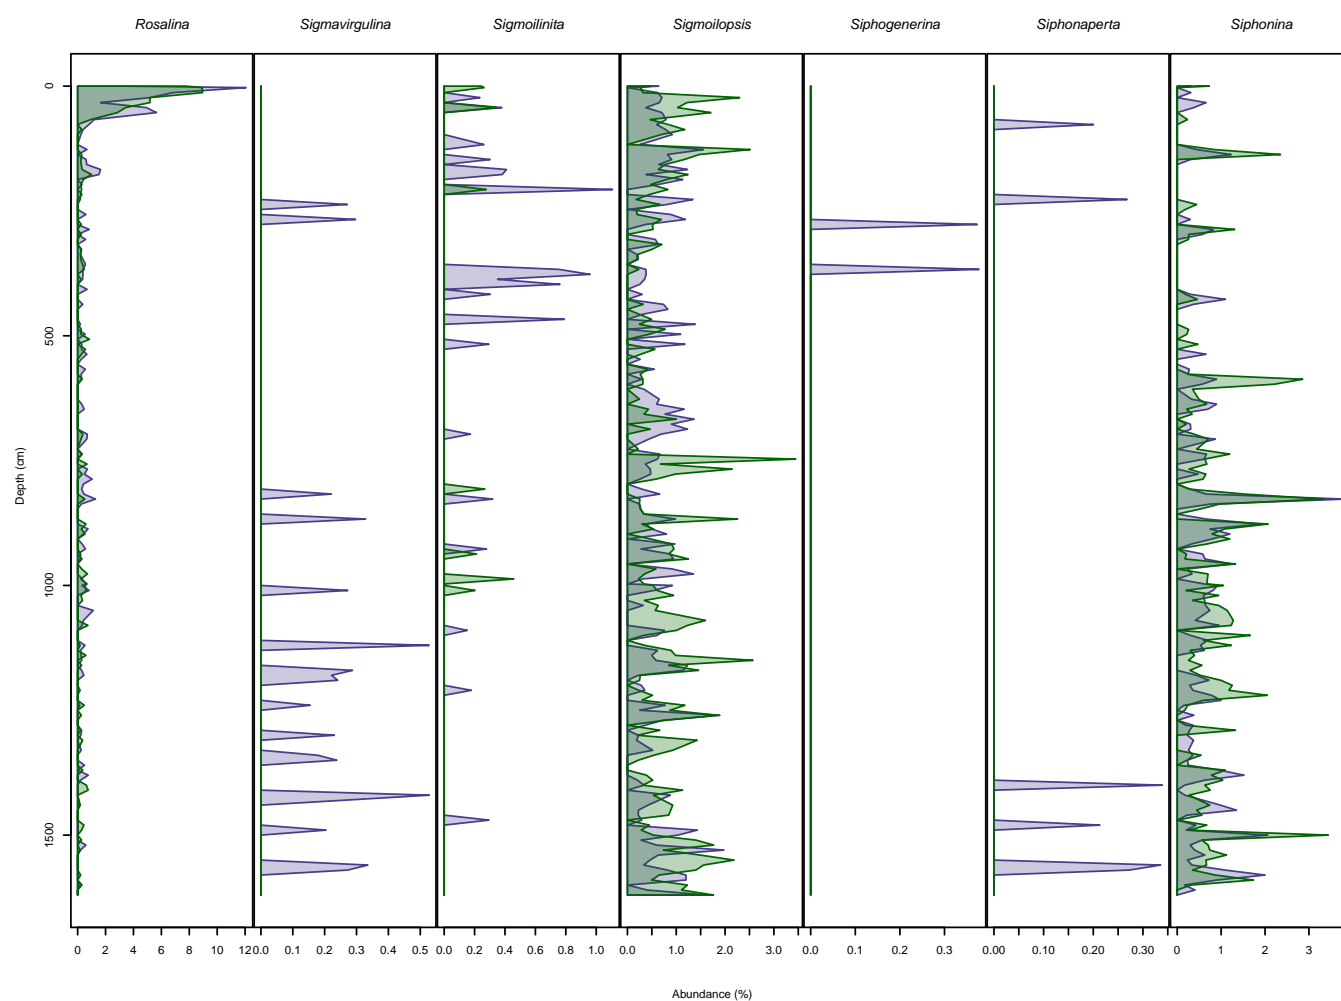

Figure S16: Relative abundances of genera of benthic Foraminifera from the Pefka E section. The abundances within the  $>125\ \mu\text{m}$  fraction (purple) and the  $>150\ \mu\text{m}$  fraction (green) are plotted together in the same graph.

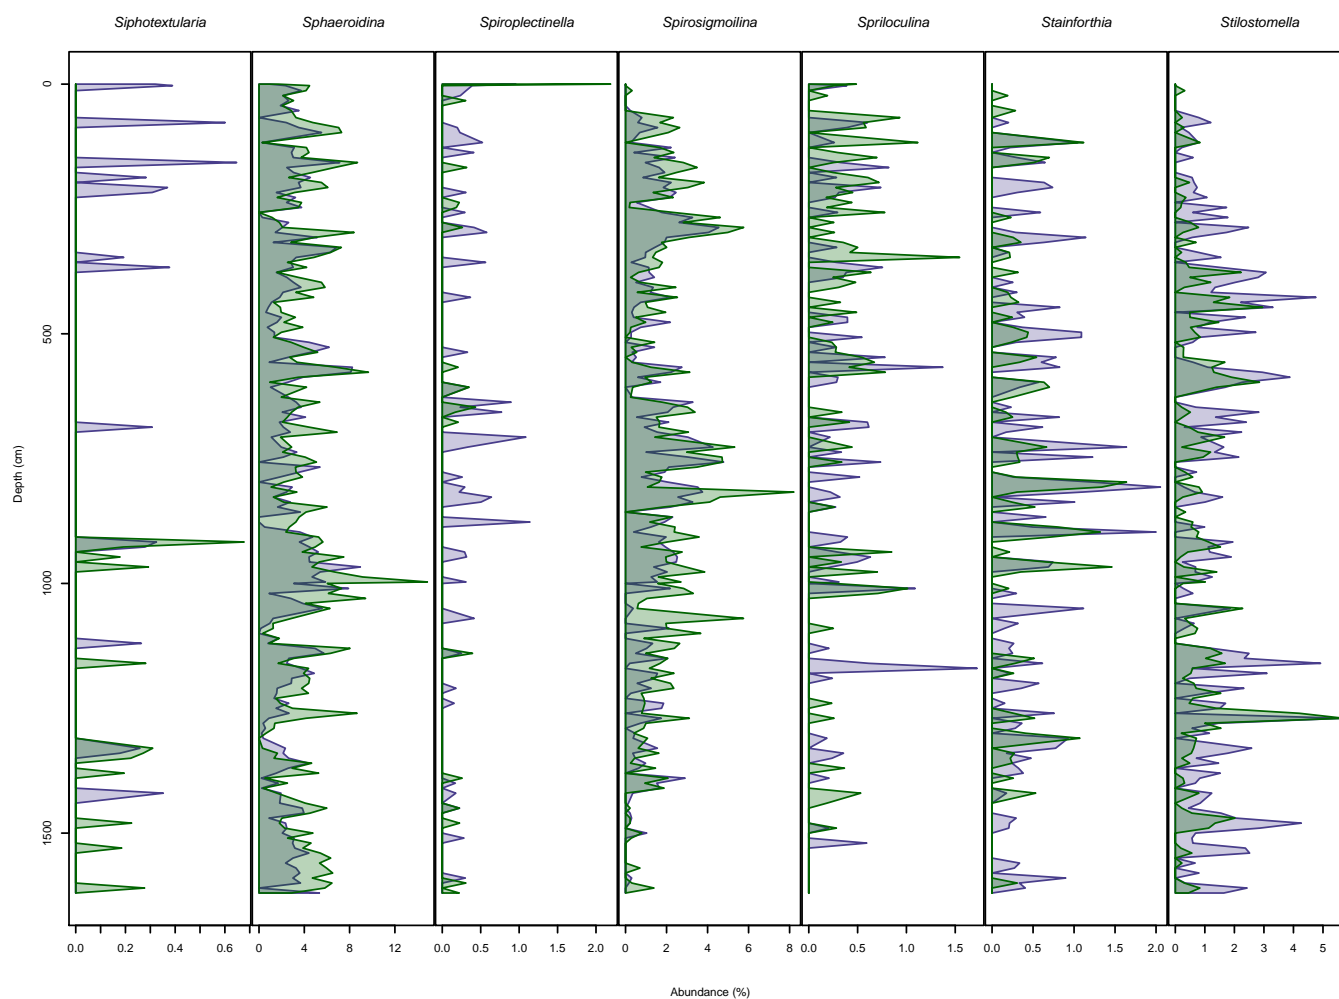

Figure S17: Relative abundances of genera of benthic Foraminifera from the Pefka E section. The abundances within the >125 µm fraction (purple) and the >150 µm fraction (green) are plotted together in the same graph.

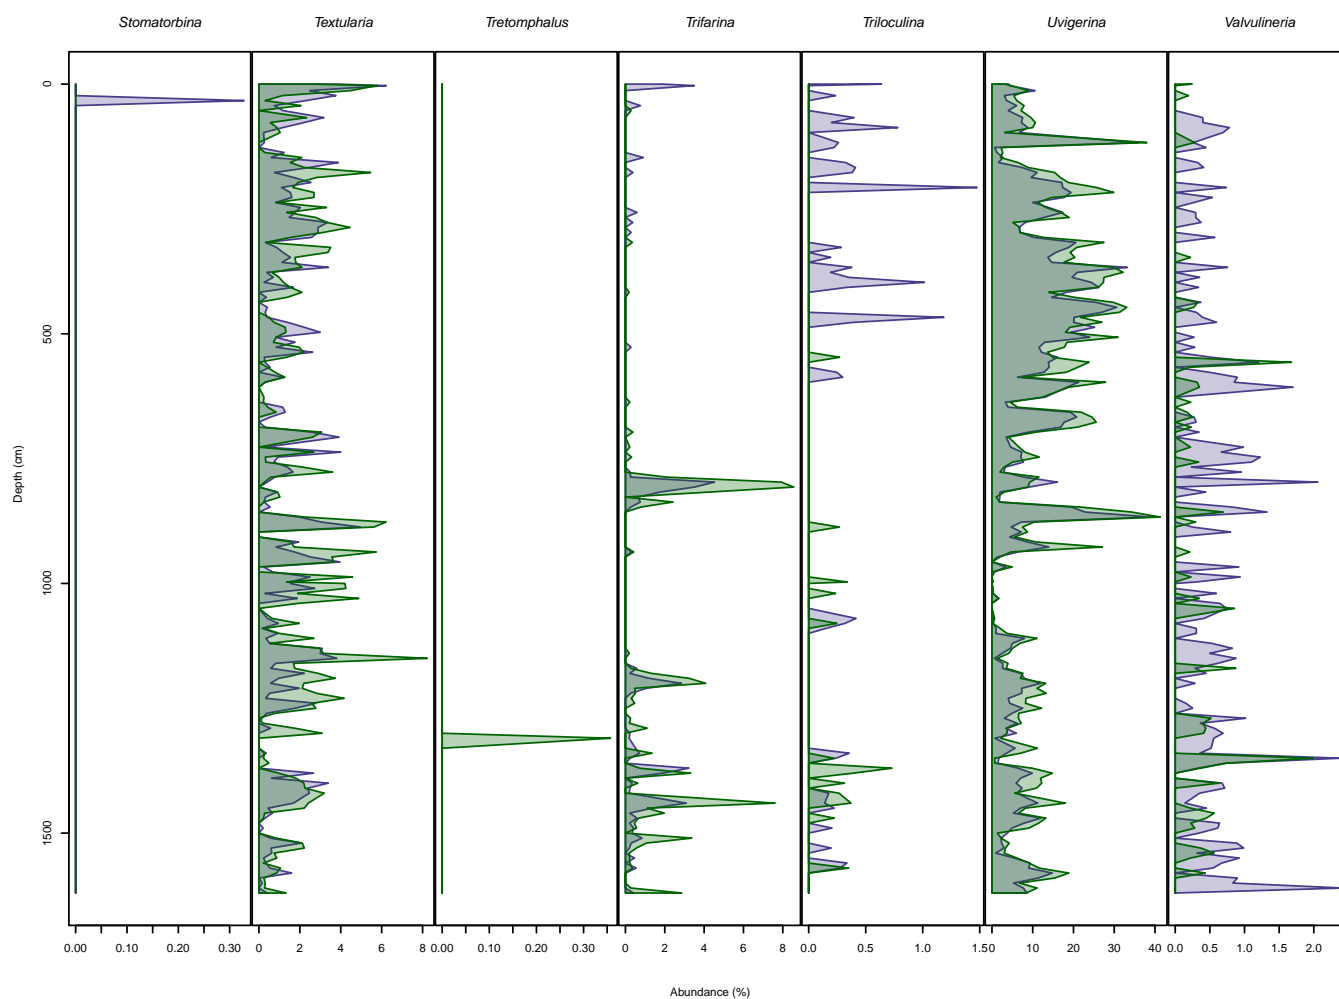

Figure S18: Relative abundances of genera of benthic Foraminifera from the Pefka E section. The abundances within the >125 µm fraction (purple) and the >150 µm fraction (green) are plotted together in the same graph.
